# Supplementary material
Source: PubMed Central journal article supplement (PMC3752331)

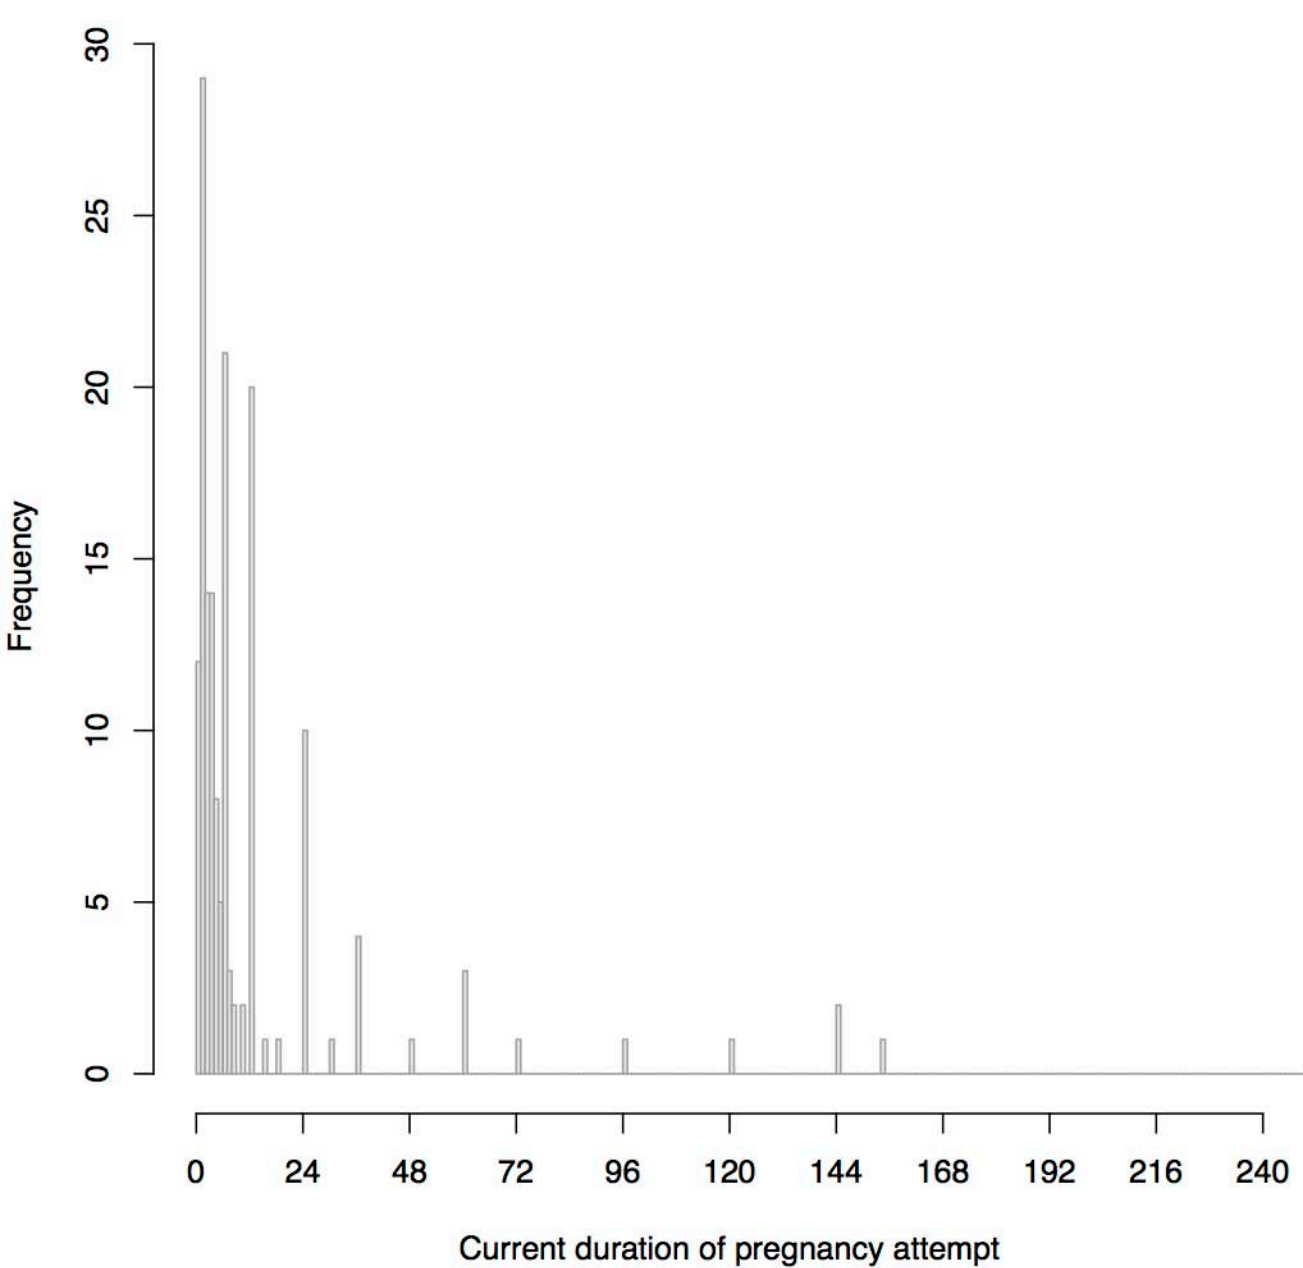

**Value at zero : 0.149**

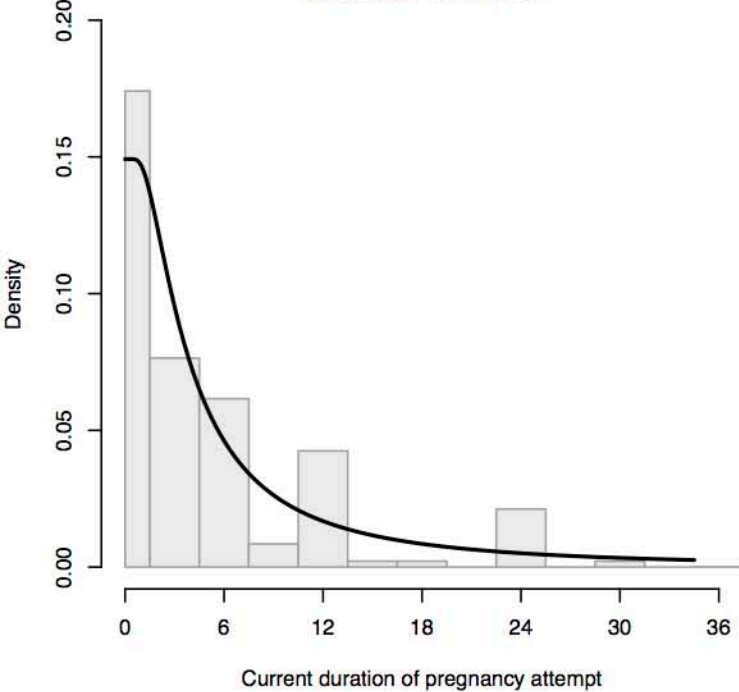

**Value at zero : 0.117**

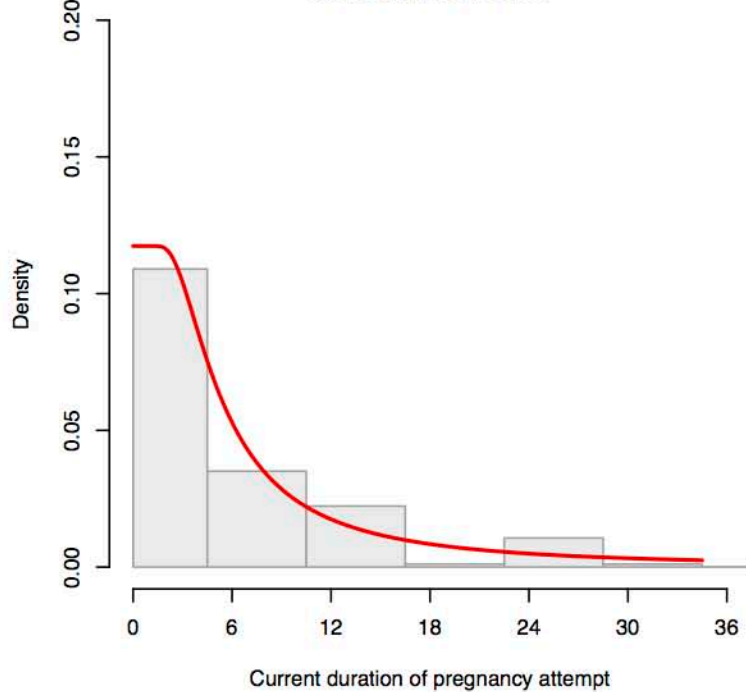

**Value at zero : 0.156**

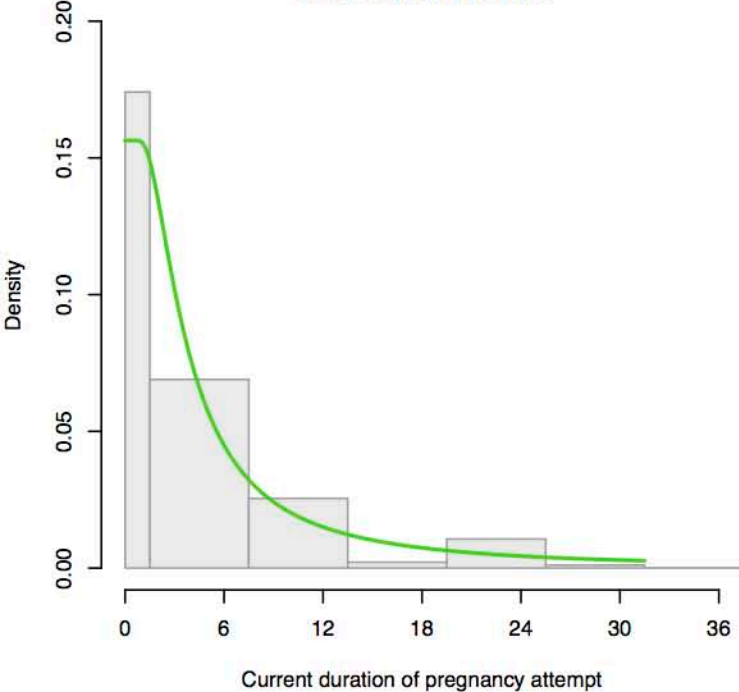

**Value at zero : 0.128**

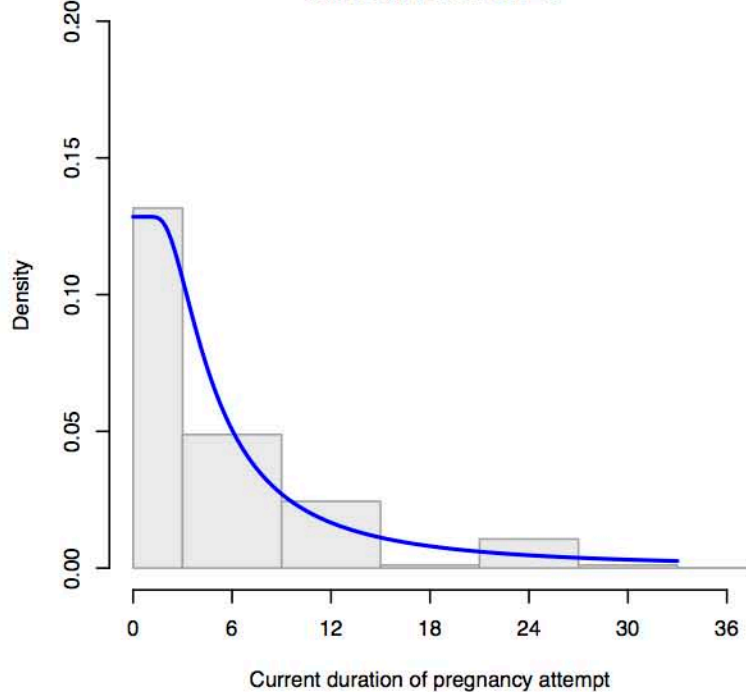

**Value at zero : 0.132**

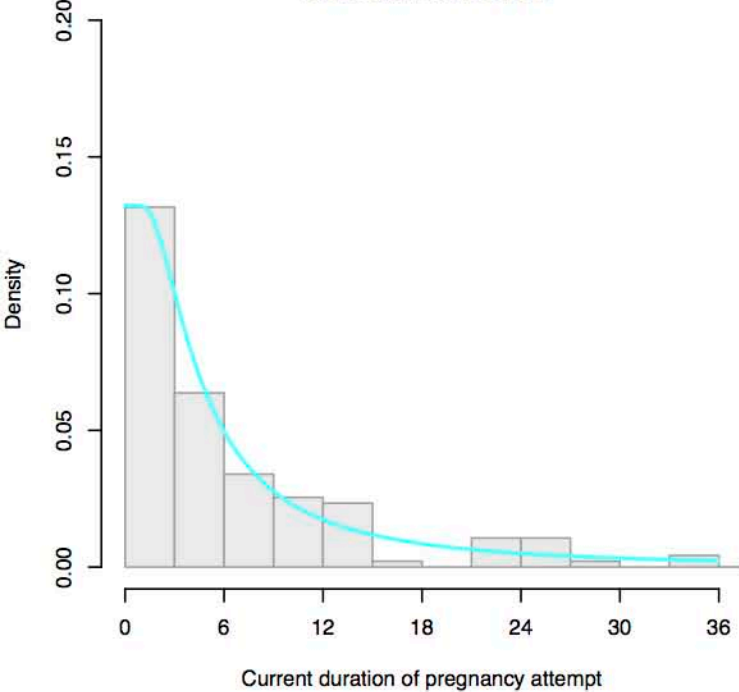

**Value at zero : 0.146**

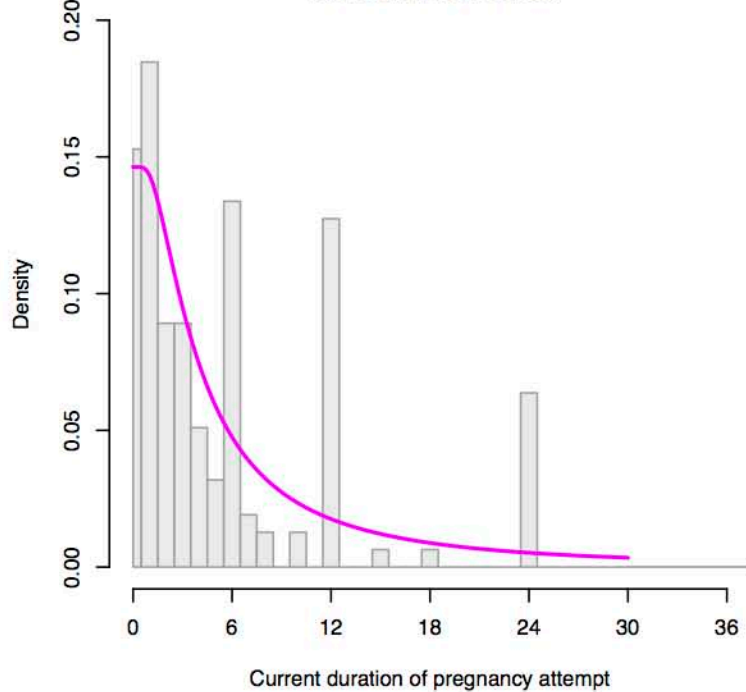

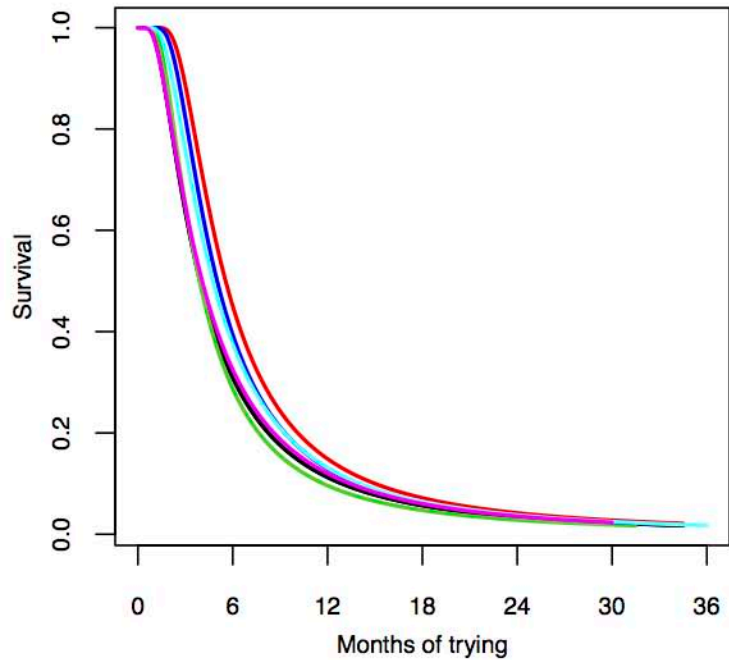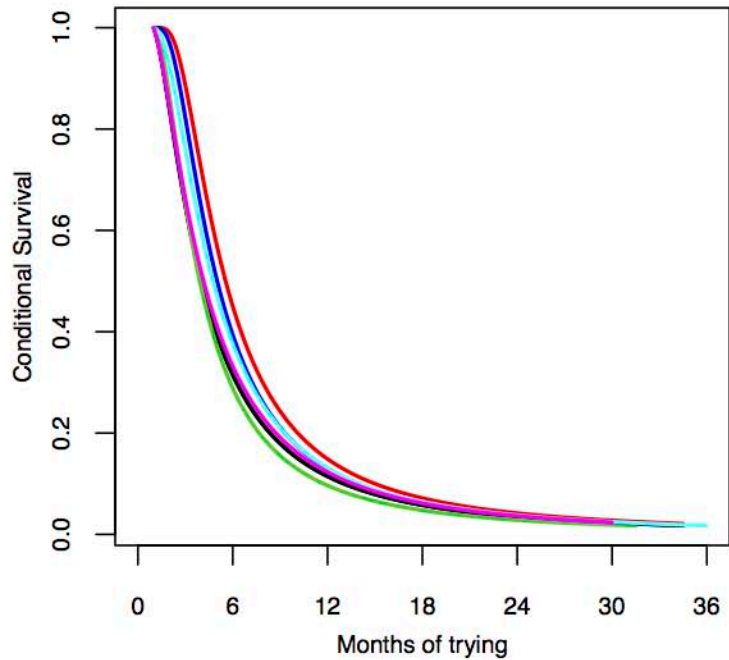

Supplement: NIHMS488974-supplement-Supp_Fig_S1-S3.pdf [file NIHMS488974-supplement-Supp_Fig_S1-S3.pdf]
